# Supplementary material for: Flexible carbon fibres with magnetic ZIF-67 as a core layer and in situ grown NiMn-LDH nanosheets as a shell layer for microwave absorption
Source: Royal Society of Chemistry journal article supplement (doi:10.1039/d4re00353e), 2024-01-01
Supplement: d4re00353e2.pdf [file d4re00353e2.pdf]

## Supporting Information

### **Flexible carbon fibres with magnetic ZIF-67 as core layer and in-situ grown NiMn-LDH nanosheets as shell layer for microwaves absorption**

Xiaofang Ma<sup>1</sup>, Ying Huang\*<sup>1</sup>, Xiaoxiao Zhao<sup>1</sup>, Meng Yu<sup>1</sup>, Yan Gao<sup>1</sup>, Bing Gao<sup>1</sup>, Sijiao Xiang<sup>1</sup>

*1 MOE Key Laboratory of Material Physics and Chemistry Under Extraordinary Conditions, School of Chemistry and Chemical Engineering, Northwestern Polytechnical University, Xi'an 710129, China*

\*Corresponding authors.

E-mail addresses: yingh@nwpu.edu.cn (Y. Huang)

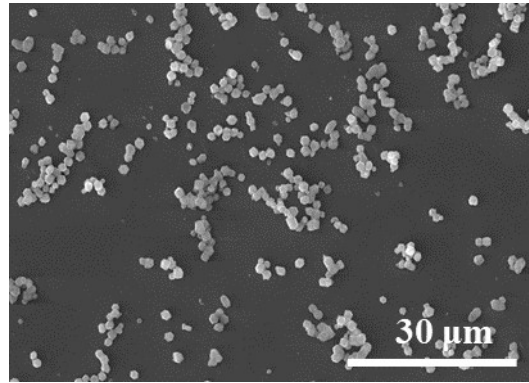

**Figure S1.** SEM images of ZIF-67

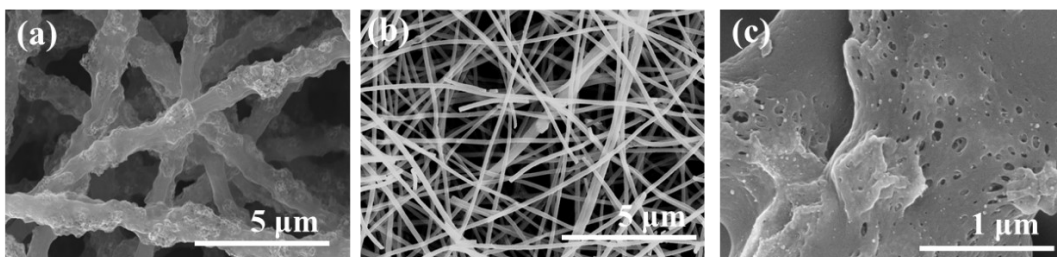

**Figure 2.** SEM morphologies of (a) Co/CFs, (b) CFs, (C) ZIF-67 creates a pore structure on the surface of CFs

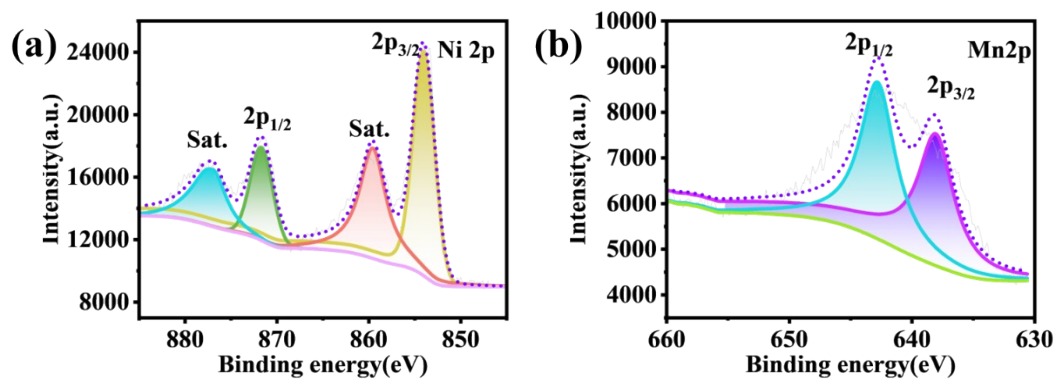

**Figure 3.** XPS spectra of CFs@NiMn-LDH of (a)Ni 2p,and (b) Mn 2p

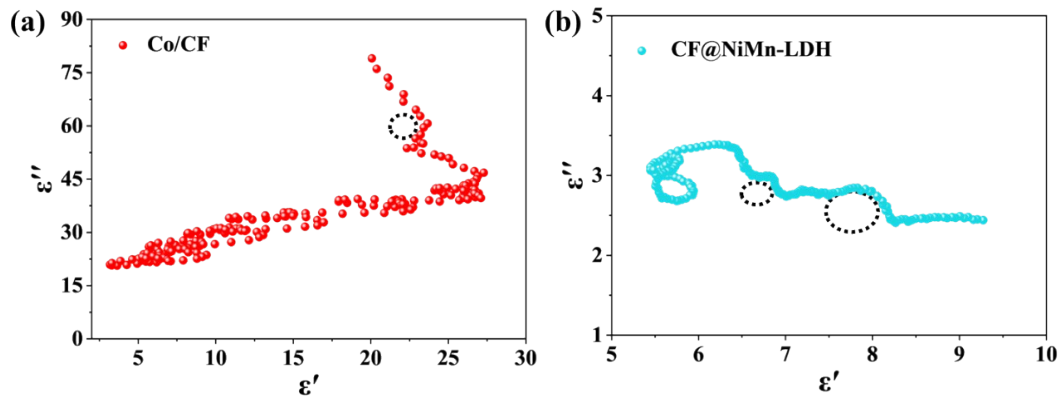

**Figure 4.** typical Cole-Cole plots of (a) Co/CFs and (b) CFs@NiMn-LDH

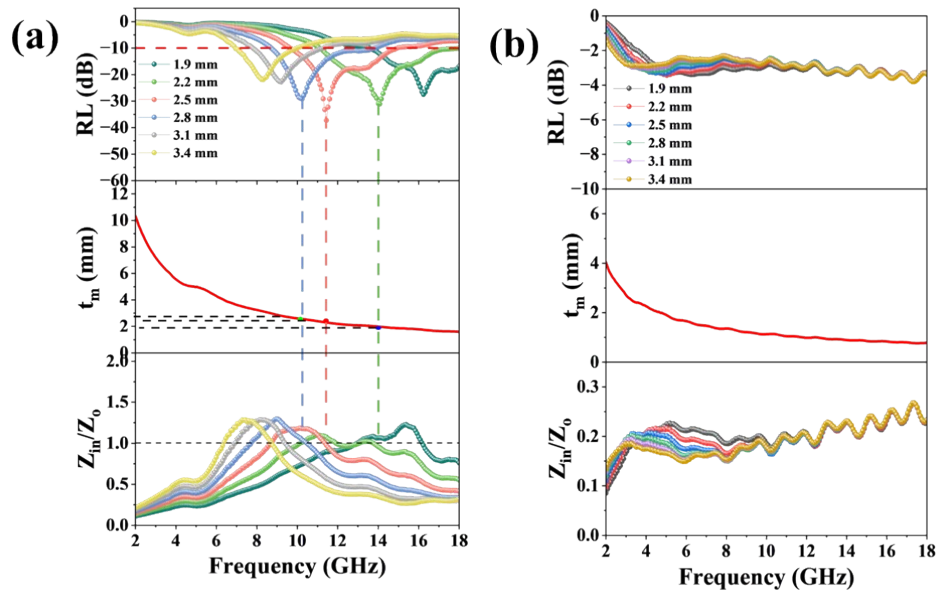

**Figure 5.** RL values, calculated matching thicknesses and impedance matching of (a) CFs@NiMn-LDH, (b) Co/CFs.

**Table S1.** Comparison of the reported EMW absorption performance of CFs-based absorbents and prepared Co/CFs@NiMn-LDH composites

| Filler                       | RL <sub>max</sub><br>Value<br>(dB) | Effective<br>Absorption<br>Bandwidth (GHz) | Thickness<br>(mm) | Ref.      |
|------------------------------|------------------------------------|--------------------------------------------|-------------------|-----------|
| <b>Mn–Zn ferrite/CFs</b>     | -28.8                              | 1.46                                       | 5.8               | [1]       |
| <b>SiC/CFs</b>               | -36.5                              | 5.5                                        | 1.9               | [2]       |
| <b>CoNi-LDHs/SCFss</b>       | -42.9                              | 3.38                                       | 2.2               | [3]       |
| <b>Co-LDH/ZIF-67/SCFs</b>    | -24.1                              | 6.5                                        | 2.1               | [4]       |
| <b>NiFe@CNF</b>              | -49.5                              | 4.72                                       | 1.4               | [5]       |
| <b>TiN/C NFs<sup>6</sup></b> | -41.84.                            | 3.9 (2.5 mm)                               | 1.9               | [6]       |
| <b>NiFe@NCFss</b>            | -39.7                              | 4.1 (1.47 mm)                              | 2.0               | [7]       |
| <b>Co/CFs@NiMn-LDH</b>       | -53.0                              | 4.0 (2.0 mm)                               | 2.8               | This work |

#### References

- [1] Bai, Y.-h.; Zhang, D.-y.; Lu, Y. J. C. I. Foamed concrete composites: Mn–Zn ferrite/carbon fiber synergy enhances electromagnetic wave absorption performance. **2023**, *49*, 33703-33716.
- [2] Qian, J.; Du, B.; Cai, M.; He, C.; Wang, X.; Xiong, H.; Shui, A. J. A. E. M. Preparation of SiC nanowire/carbon fiber composites with enhanced electromagnetic wave absorption performance. **2021**, *23*, 2100434.
- [3] Yu, T.; Qiu, J.; Liao, J.; Wang, X.; Chen, W.; Cheng, Y.; Wang, W.; Song, Y.-F. J. J. o. A.; Compounds. Topological transformation strategy for layered double hydroxide@ carbon nanofibers as highly efficient electromagnetic wave absorber. **2021**, *867*, 159046.
- [4] Zhao, Z.; Kou, K.; Zhang, L.; Wu, H. J. J. o. C.; Science, I. High efficiency electromagnetic wave absorber derived from transition metal layered double hydroxides. **2020**, *579*, 733-740.
- [5] Zhao, Z.; Zhou, X.; Kou, K.; Wu, H. J. C. PVP-assisted transformation of ZIF-67 into cobalt layered double hydroxide/carbon fiber as electromagnetic wave absorber. **2021**, *173*, 80-90.
- [6] Wei, Y.; Zhang, L.; Gong, C.; Liu, S.; Zhang, M.; Shi, Y.; Zhang, J. J. J. o. A.; Compounds. Fabrication of TiN/Carbon nanofibers by electrospinning and their electromagnetic wave absorption properties. **2018**, *735*, 1488-1493.
- [7] Chen, F.; Zhang, S.; Guo, R.; Ma, B.; Xiong, Y.; Luo, H.; Cheng, Y.; Wang, X.; Gong, R. J. C. P. B. E. 1D magnetic nitrogen doped carbon-based fibers derived from NiFe Prussian blue analogues embedded polyacrylonitrile via electrospinning with tunable microwave absorption. **2021**, *224*, 109161.
